# Supplementary material
Source: publisher site journal article supplement (https://e-cmh.org/upload/media/cmh-2021-0174-suppl7.pdf)
Supplement: Supplementary file 1 [file cmh-2021-0174-suppl7.pdf]

**Supplementary Table 2.** Baseline features and pregnancy outcomes of the development and test datasets

| Characteristic                                   | Model development dataset (n=958) | Test dataset (n=485) | P-value |
|--------------------------------------------------|-----------------------------------|----------------------|---------|
| Baseline characteristics                         |                                   |                      |         |
| Age (years)                                      | 32.3±3.9                          | 32.2±4.3             | 0.773   |
| Nulliparity                                      | 513 (53.5)                        | 254 (52.4)           | 0.713   |
| BMI before pregnancy (kg/m <sup>2</sup> )        | 22.3±3.8                          | 22.3±3.6             | 0.548   |
| WC before pregnancy (cm) (n=1,418)               | 71.2±5.9                          | 71.0±5.8             | 0.682   |
| Laboratory results in early pregnancy            |                                   |                      |         |
| Gestational age at measurement                   | 7.7±1.4                           | 7.8±1.5              | 0.234   |
| Hemoglobin (g/dL)                                | 12.7±1.0                          | 12.7±1.0             | 0.816   |
| Platelet counts (×10 <sup>3</sup> /uL)           | 252.4±53.8                        | 251.5±54.6           | 0.647   |
| AST (U/L)                                        | 16.1±6.8                          | 16.2±5.4             | 0.431   |
| ALT (U/L)                                        | 14.6±10.7                         | 15.0±11.9            | 0.311   |
| Laboratory and ultrasound results at 10–14 weeks |                                   |                      |         |
| Gestational age at measurement                   | 12.4±0.5                          | 12.4±0.6             | 0.326   |
| AST (U/L)                                        | 16.8±11.9                         | 16.5±7.5             | 0.785   |
| ALT (U/L)                                        | 13.0±16.1                         | 13.0±10.4            | 0.299   |
| Cholesterol (mg/dL)                              | 173.2±30.3                        | 171.3±30.3           | 0.313   |
| HDL cholesterol (mg/dL)                          | 68.5±14.5                         | 68.0±14.0            | 0.936   |
| LDL cholesterol (mg/dL)                          | 82.0±22.6                         | 80.7±22.5            | 0.376   |
| Triglycerides (mg/dL)                            | 113.6±46.4                        | 112.9±47.4           | 0.751   |
| γ-GT (U/L)                                       | 13.8±8.5                          | 14.0±8.4             | 0.250   |
| Fasting glucose (mg/dL)                          | 80.3±9.5                          | 79.7±9.2             | 0.148   |
| HIS                                              | 30.4±5.1                          | 30.7±5.0             | 0.206   |
| NAFLD by liver ultrasound                        | 120 (12.7)                        | 70 (14.5)            | 0.397   |
| Pregnancy outcome                                |                                   |                      |         |
| Gestational age at delivery (weeks)              | 38.9±1.3                          | 38.8±1.6             | 0.145   |
| Birthweight (kg)                                 | 3.2±0.4                           | 3.2±0.5              | 0.949   |
| Large-for-gestational age neonates               | 94 (10.1)                         | 58 (12.1)            | 0.273   |

Values are presented as mean±standard deviation or number (%).

BMI, body mass index; WC, waist circumference; AST, aspartate aminotransferase; ALT, alanine aminotransferase; HDL, high-density lipoprotein; LDL, low-density lipoprotein; γ-GT, gamma-glutamyl transferase; HIS, hepatic steatosis index; NAFLD, nonalcoholic fatty liver disease.
